# Supplementary material for: Polymeric cathode materials of electroactive conducting poly(triphenylamine) with optimized structures for potential organic pseudo-capacitors with higher cut-off voltage and energy density
Source: Royal Society of Chemistry journal article supplement (doi:10.1039/c4ra14401e), 2014-12-12
Supplement: c4ra14401e1.pdf [file c4ra14401e1.pdf]

## Electronic Supporting Information (ESI)

---

### **Organic Pseudo-capacitors of Higher Cut-off Voltage and Energy Density Based on Electroactive Conducting Poly(triphenylamine) with Optimized Structures as Polymeric Cathode Materials**

Wei Ni,<sup>1,2</sup> Jianli Cheng,<sup>1,2</sup> Xiaodong Li,<sup>1,2</sup> Ling Huang,<sup>1,2</sup> Guifang Gu,<sup>1,2</sup> Qun Guan,<sup>1,2</sup> Demao Yuan,<sup>1,2</sup> Bin Wang\*<sup>1,2</sup>

<sup>1</sup> *Institute of Chemical Materials, China Academy of Engineering Physics (CAEP), Mianyang 621900, China. E-mail: niwei2013@caep.cn (W. Ni); edward.bwang@gmail.com (B. Wang); Fax: +86 816-2544426*

<sup>2</sup> *Sichuan Research Center of New Materials, Mianyang 621000, China*

a)

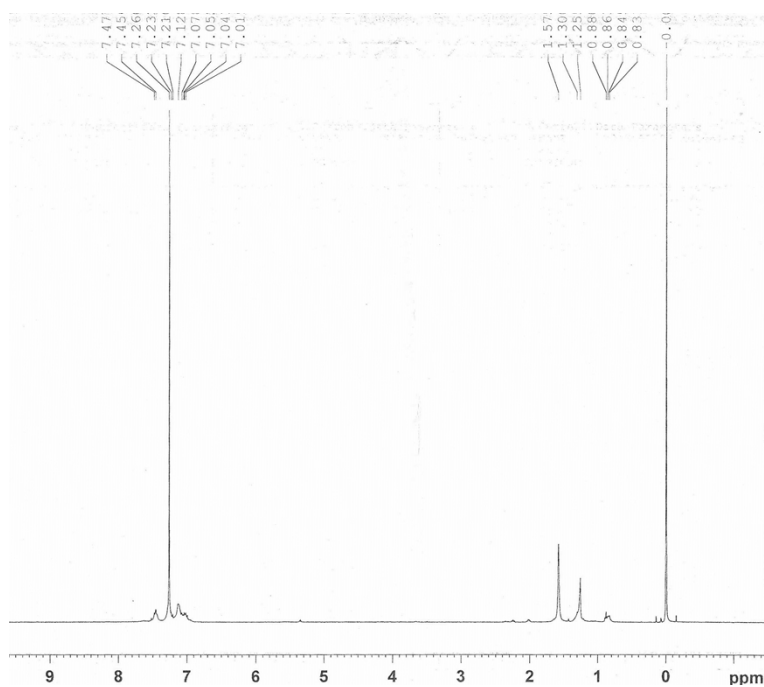

b)

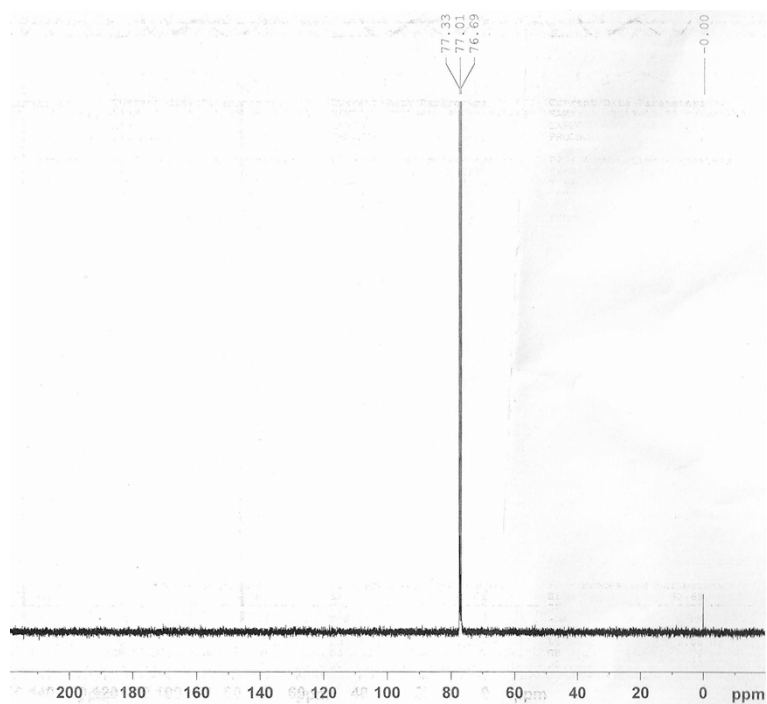

**Figure S1.** a)  $^1\text{H}$  NMR and b)  $^{13}\text{C}$  NMR spectroscopy of the  $\text{PTPA}_{(\text{particulates})}/\text{CDCl}_3$  suspension. Chemical shifts were expressed in parts per million ( $\delta$ ) using tetramethylsilane (TMS) as internal standards ( $^1\text{H}$ : chloroform:  $\delta$  7.26 ppm;  $^{13}\text{C}$ :  $\text{CDCl}_3$ : 77.23 ppm). It showed very weak characteristic peaks of the polymer PTPA except the background peaks corresponding to the solvent (deuterated chloroform), which further verified the insolubility in solvents of the PTPA particulates.

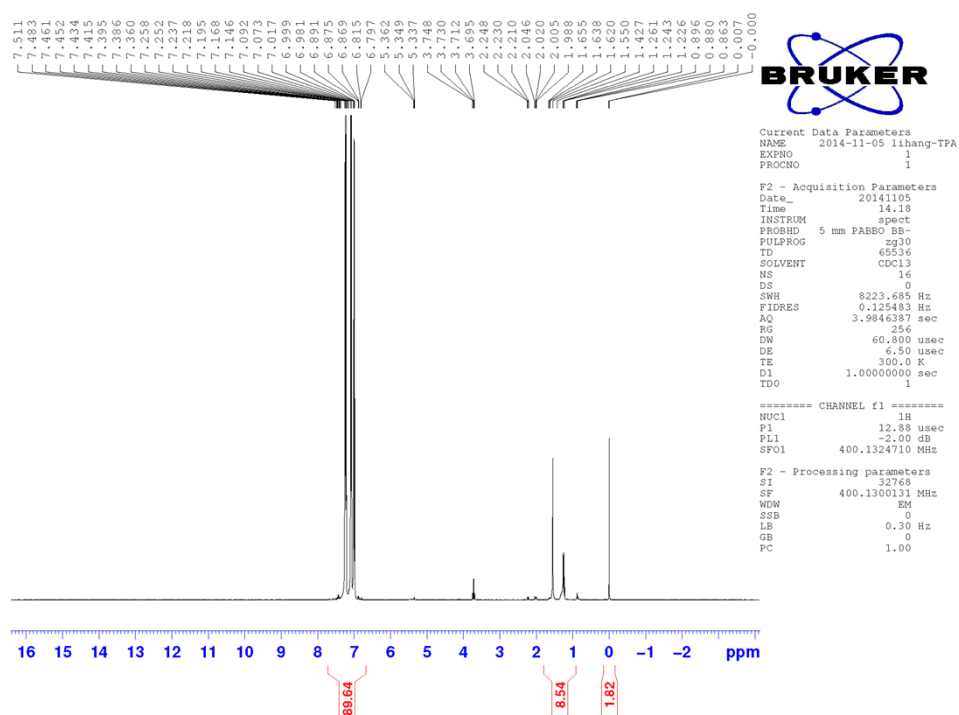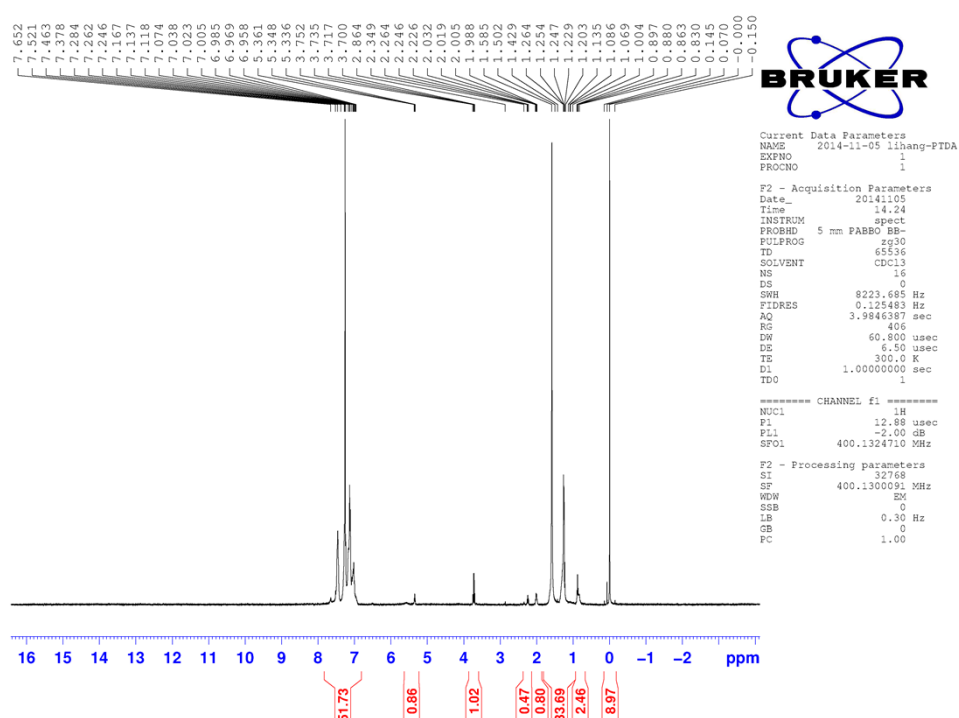

**Figure S2.**  $^1\text{H}$  NMR spectroscopy of the PTPA<sub>(microfibers)</sub>/CDCl<sub>3</sub> solution. It showed the enhanced characteristic peaks of the polymer PTPA. The linear polymer PTPA is soluble in the related solvent (e.g., chloroform). For the FT-NMR of TPA (triphenylamine), see the website: <http://www.sigmaaldrich.com/spectra/fnmr/FNMR011567.PDF>

a)

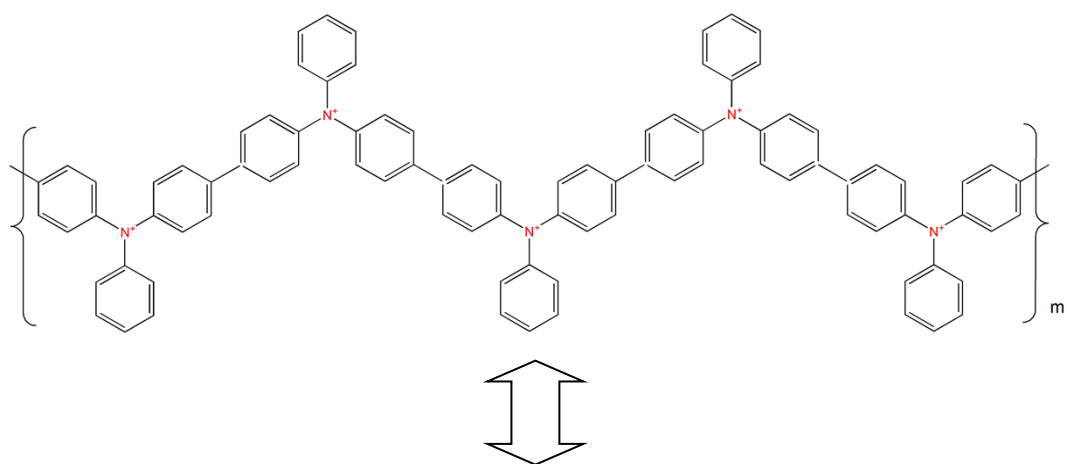

b)

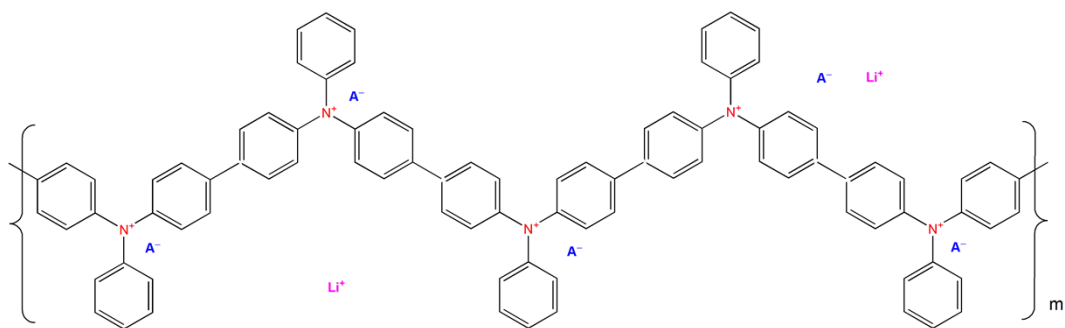

**Figure S3.** The structural representation of the as-synthesized linear polymer molecule (soluble): a) pristine state, b) charged state.

a)

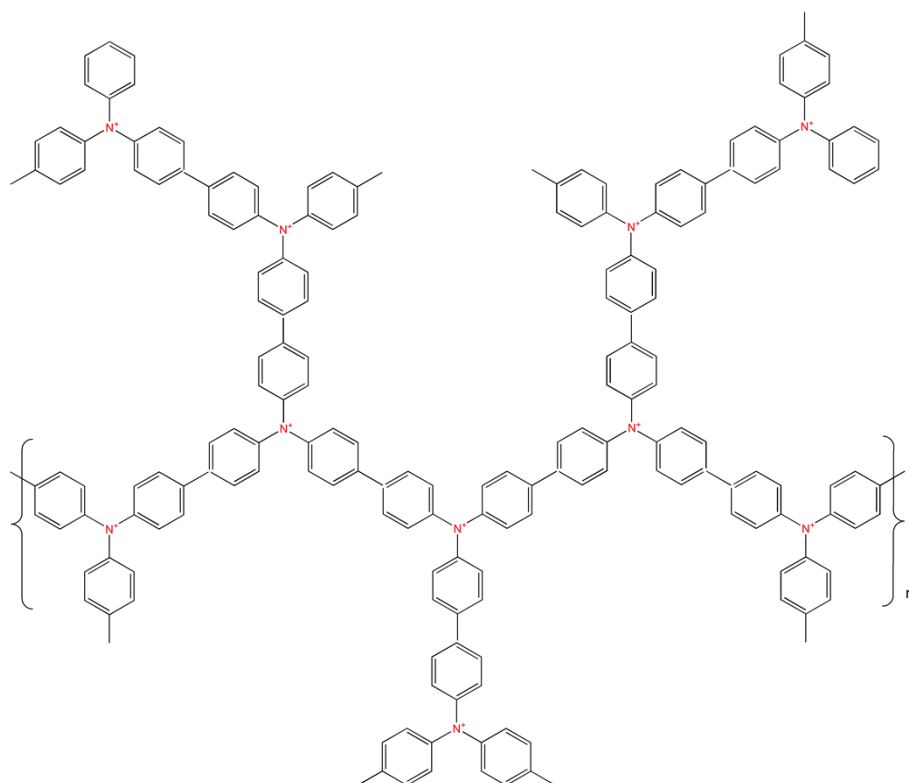

b)

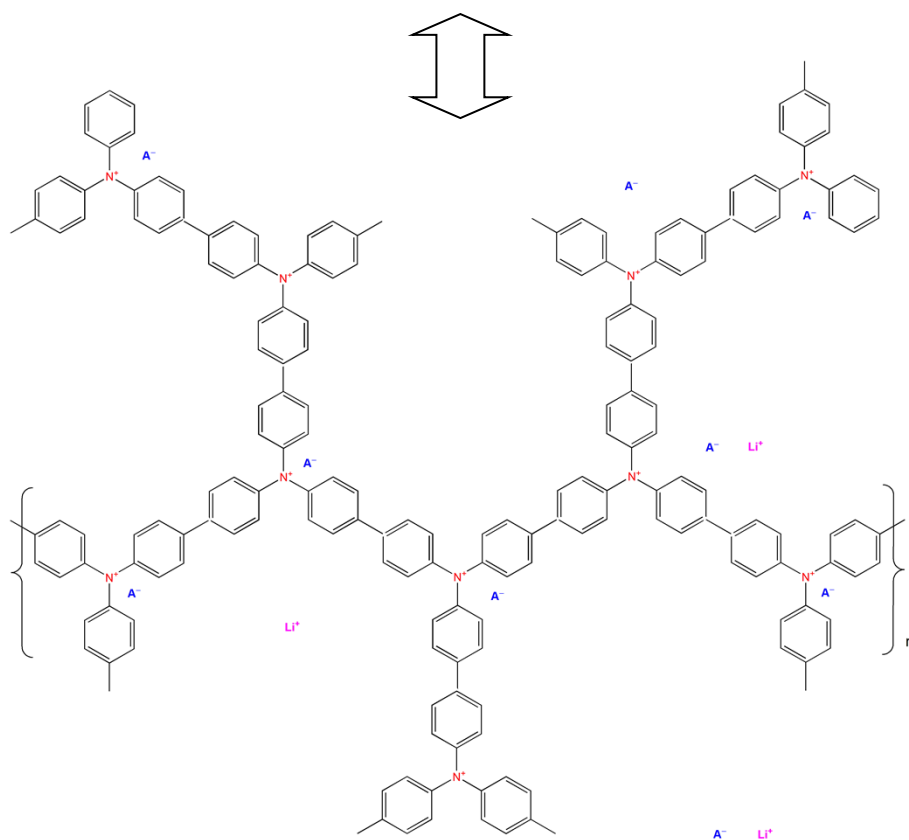

**Figure S4** The structural representation of the as-synthesized crosslinked polymer molecule (insoluble): a) pristine state, b) charged state.
